# Supplementary material for: Development of Teleost Intermuscular Bones Undergoing Intramembranous Ossification Based on Histological-Transcriptomic-Proteomic Data
Source: MDPI journal article supplement (doi:10.3390/ijms20194698), 2019-09-22
Supplement: s1 [file s1]

# Development of teleost intermuscular bones undergoing intramembranous ossification based on histological-transcriptomic-proteomic data

Chun-Hong Nie <sup>1,2</sup>, Shi-Ming Wan <sup>1,2</sup>, Yu-Long Liu <sup>4</sup>, Han Liu <sup>1,2</sup>, Wei-Min Wang <sup>1,2</sup> and Ze-Xia Gao <sup>1,2,3\*</sup>

<sup>1</sup> College of Fisheries, Key Lab of Agricultural Animal Genetics, Breeding and Reproduction of Ministry of Education/Key Lab of Freshwater Animal Breeding, Ministry of Agriculture, Huazhong Agricultural University, Wuhan, Hubei 430070, China; [1508085740@qq.com](mailto:1508085740@qq.com) (C.H. N); [276222007@qq.com](mailto:276222007@qq.com) (S.M. W); [592299190@qq.com](mailto:592299190@qq.com) (H. L); [wangwm5911@gmail.com](mailto:wangwm5911@gmail.com) (W.M. W)

<sup>2</sup> Engineering Technology Research Center for Fish Breeding and Culture in Hubei Province, Wuhan 430070, China

<sup>3</sup> National Demonstration Center for Experimental Aquaculture Education, Huazhong Agricultural University, Wuhan 430070, China

<sup>4</sup> Department of Molecular and Cellular Biology, University of California Davis, Davis 95616, California, USA; [ldrliu@ucdavis.edu](mailto:ldrliu@ucdavis.edu) (Y.L. L)

\* Correspondence: [gaozexia@hotmail.com](mailto:gaozexia@hotmail.com); Tel/Fax: +86-27-8728-2113

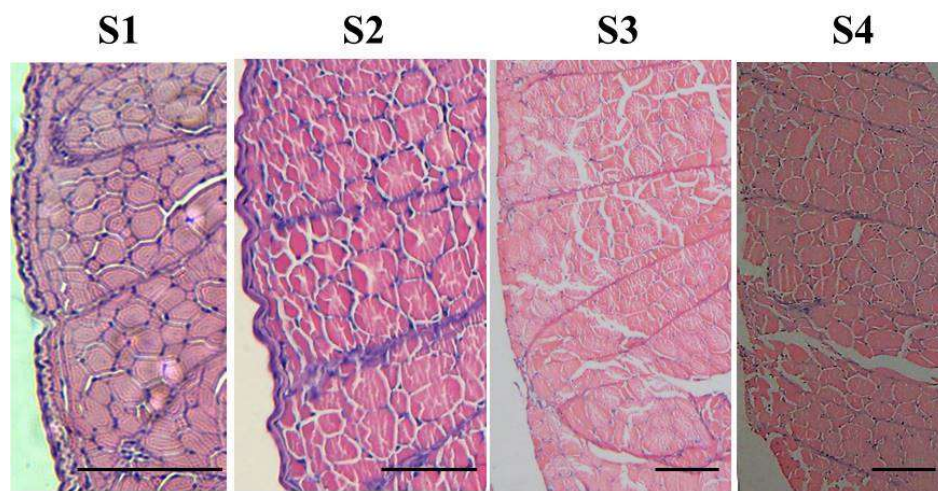

**Figure S1** The histology structure with HE staining of muscle tissues at four stages. Scales bars = 50  $\mu$ m.

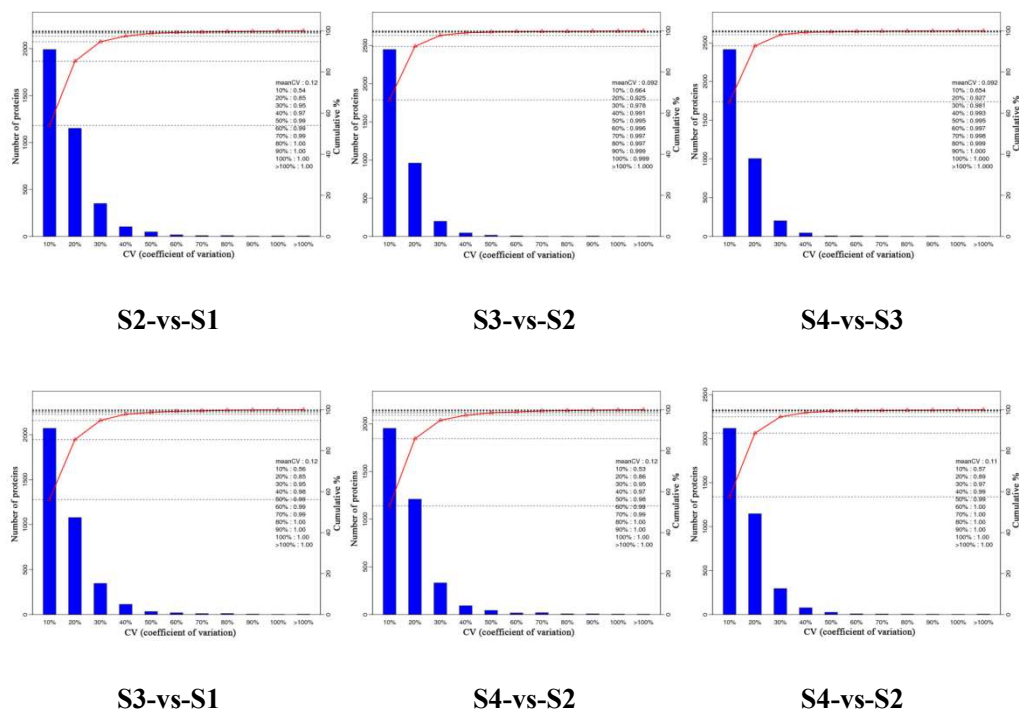

**Figure S2** Repeatability analysis of data obtained from iTRAQ in different groups.

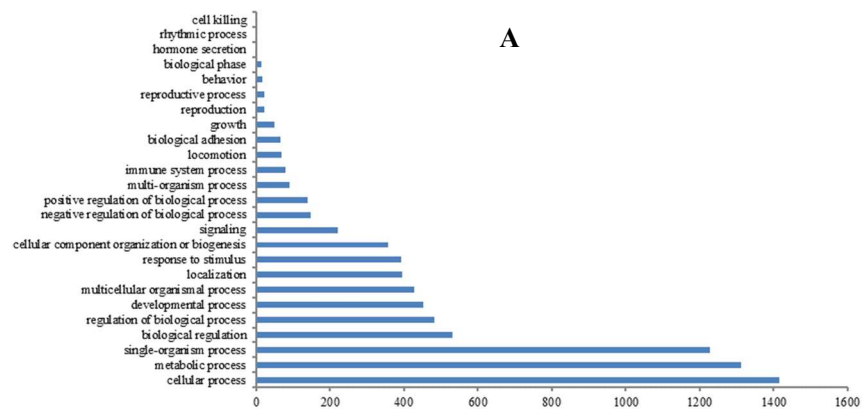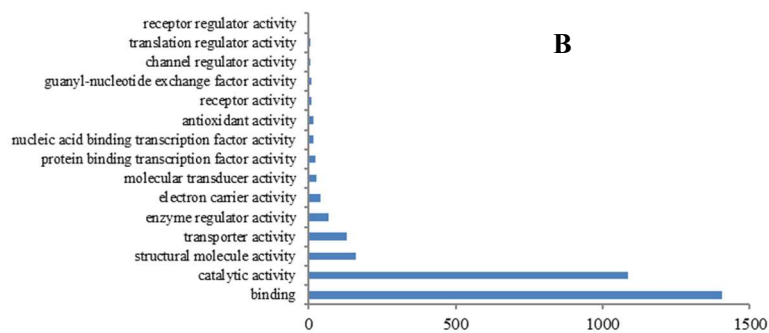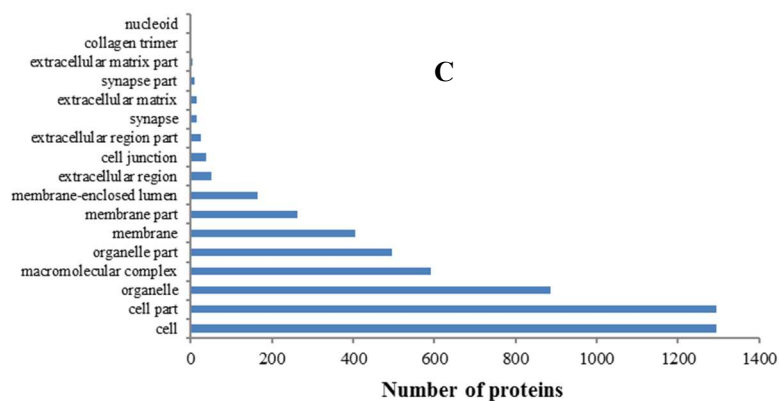

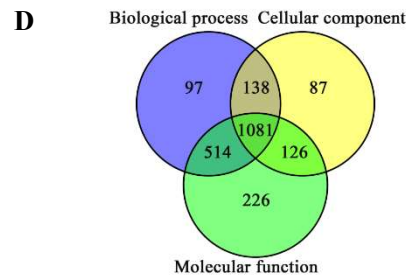

**Figure S3** Proteins were functionally annotated for (A) biological process, (B) molecular function, as well as (C) cellular component and Venn diagram of proteins annotated for three processes (D).

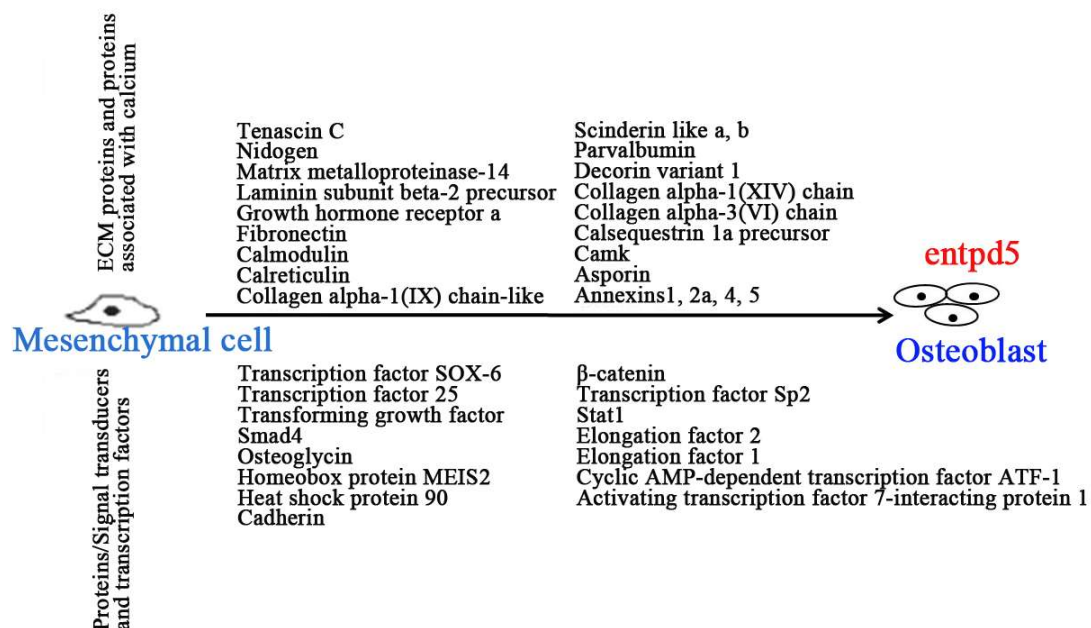

**Figure S4** Schematic representation of the key proteins in osteoblastogenesis during IB ossification process.

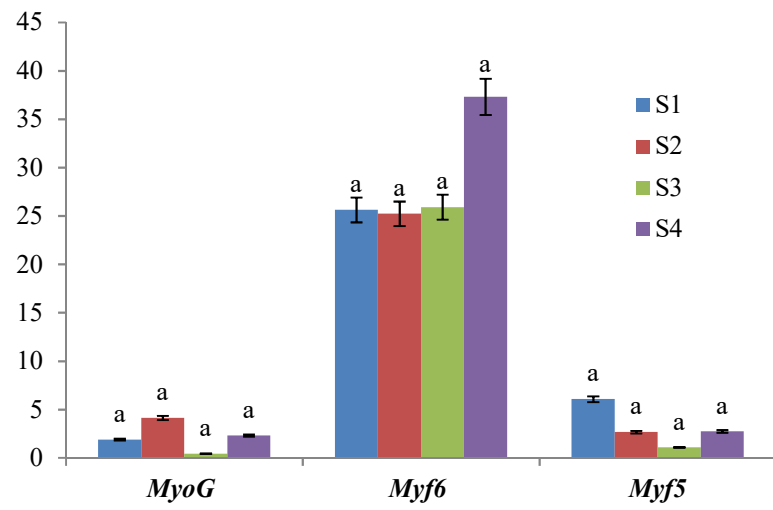

**Figure S5** Expression of muscle-related genes at different stages based on RNA-seq data.

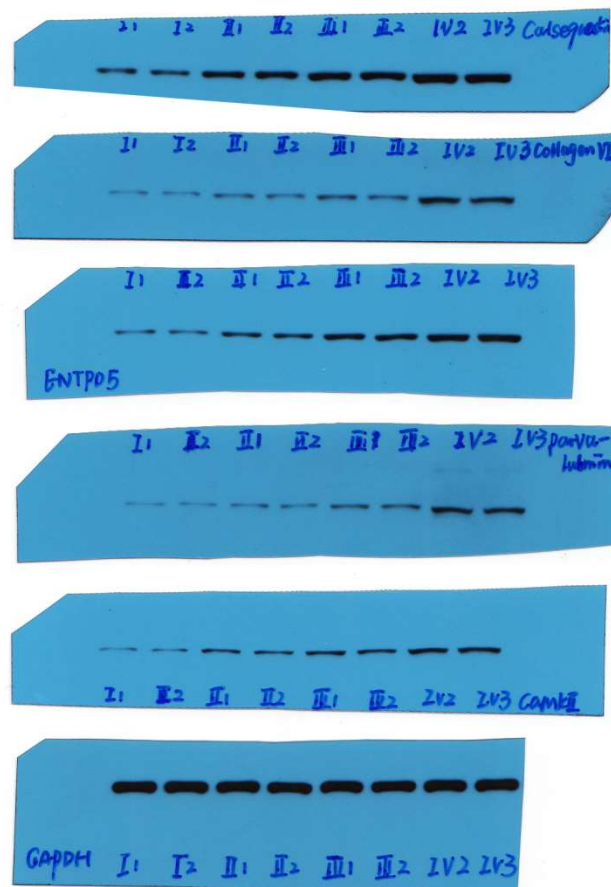

**Figure S6** The raw data photo of western blot for five proteins; GAPDH is used as a loading control.

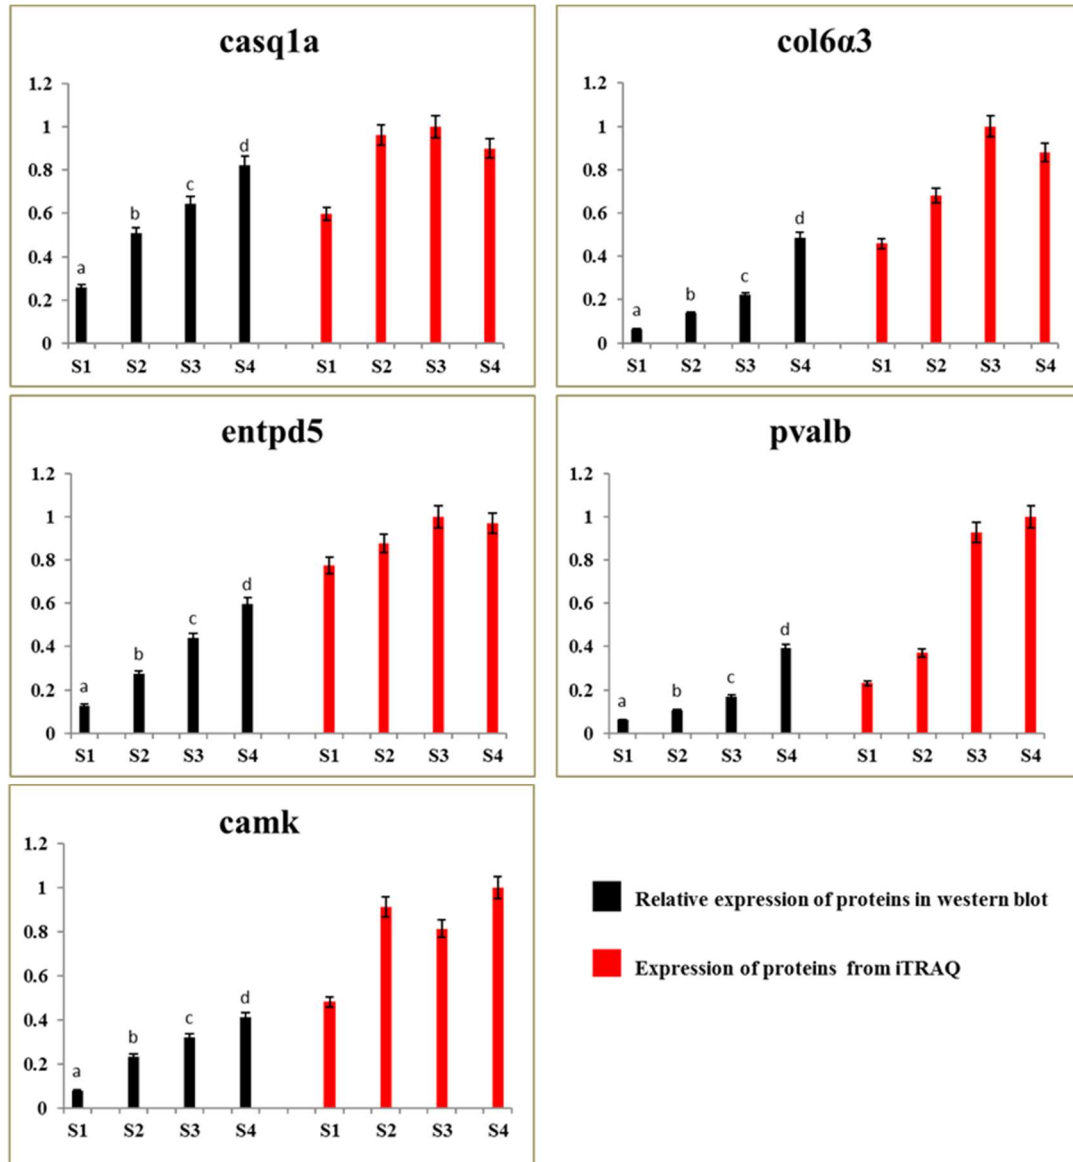

**Figure S7** Comparison of expression levels for the 5 detected bone-related proteins based on iTRAQ and western blot results. Different letters above pillars for each stage indicated statistical significance at the level of  $p < 0.05$ .

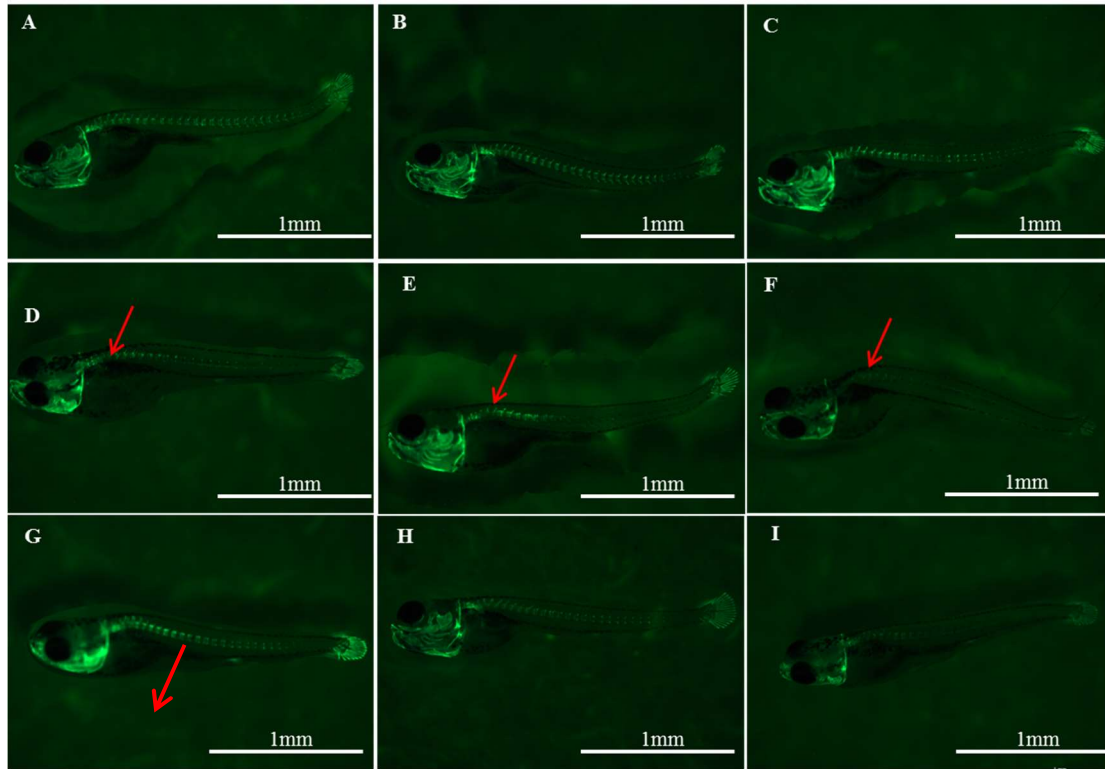

**Figure S8** Effects of IWP-L6 (D–F) and K02288 (G–I) on Tg (*sp7/eGFP*) expression of vertebrate in zebrafish larvae. Control larvae (A, B, C) were treated with DMSO. Red arrows represent that part of vertebrate had a curved phenomenon.
